# Supplementary material
Source: Elsevier journal article supplement (https://www.sciencedirect.com/science/article/pii/S0300893224003890)
Supplement: mmc1 [file mmc1.pdf]

**MATERIAL ADICIONAL**

**Tabla 1 del material adicional**

Filtro de vena cava

|                            |                                                                                                                                                                                                                                                                                                                                                                                                                                                                                                                                                                                                                                                                                                                                                                                                                                                                                                                                       |
|----------------------------|---------------------------------------------------------------------------------------------------------------------------------------------------------------------------------------------------------------------------------------------------------------------------------------------------------------------------------------------------------------------------------------------------------------------------------------------------------------------------------------------------------------------------------------------------------------------------------------------------------------------------------------------------------------------------------------------------------------------------------------------------------------------------------------------------------------------------------------------------------------------------------------------------------------------------------------|
| <b>Filtro de vena cava</b> | <ul style="list-style-type: none"><li>• La inserción rutinaria de FVC removible en pacientes en riesgo alto de EP que pueden anticoagularse y el implante profiláctico de FVC removible en pacientes politraumatizados que requieren retrasar el inicio de anticoagulación entre 3 y 7 días no ha demostrado reducir la embolia pulmonar.</li><li>• Tampoco se ha observado reducción de muerte por cualquier causa ni asociada a EP tras implante de FVC<sup>1-3</sup>.</li><li>• En portadores de FVC se ha observado un incremento de trombosis del sistema venoso distal al FVC en el seguimiento<sup>1,3</sup>.</li><li>• Aun así, las guías le otorgan una recomendación IIa con nivel de evidencia C en pacientes con contraindicación absoluta para anticoagulación y EP aguda o trombosis venosa proximal reciente (&lt; 1 mes) y en pacientes con EP recidivante a pesar de correcta anticoagulación<sup>4</sup>.</li></ul> |
|----------------------------|---------------------------------------------------------------------------------------------------------------------------------------------------------------------------------------------------------------------------------------------------------------------------------------------------------------------------------------------------------------------------------------------------------------------------------------------------------------------------------------------------------------------------------------------------------------------------------------------------------------------------------------------------------------------------------------------------------------------------------------------------------------------------------------------------------------------------------------------------------------------------------------------------------------------------------------|

FVC, filtro de vena cava; EP, embolia pulmonar.

**Tabla 2 del material adicional**

Recomendaciones sobre reperfusión en las guías clínicas y documentos de consenso más recientes.

| Guías                                                                               | EP de alto riesgo (EP masiva)                                                                                                                                                                                                                                                                                                                    | EP de intermedio riesgo (EP submasiva)                                                                                                                                                                                                                                                                      |
|-------------------------------------------------------------------------------------|--------------------------------------------------------------------------------------------------------------------------------------------------------------------------------------------------------------------------------------------------------------------------------------------------------------------------------------------------|-------------------------------------------------------------------------------------------------------------------------------------------------------------------------------------------------------------------------------------------------------------------------------------------------------------|
| <b>Declaración científica de AHA sobre EP masiva y submasiva (2012)<sup>5</sup></b> | <ul style="list-style-type: none"> <li>• Reperfusión con TS si hay riesgo aceptable de sangrado (IIa, C)</li> <li>• IDC o EQ en fallo o contraindicaciones de TS (IIa, C)</li> </ul>                                                                                                                                                             | <ul style="list-style-type: none"> <li>• Reperfusión con TS puede considerarse si hay pruebas clínicas de pronóstico adverso y bajo riesgo de complicaciones hemorrágicas (IIb, C)</li> <li>• Podría valorarse IDC o EQ si hay pruebas clínicas de pronóstico adverso (IIb, C)</li> </ul>                   |
| <b>Guías ESC 2019<sup>4</sup></b>                                                   | <ul style="list-style-type: none"> <li>• Reperfusión con TS (I, B)</li> <li>• EQ en fallo de TS o contraindicación de TS (I, C)</li> <li>• IDC en fallo de TS o contraindicación de TS (IIa, C)</li> </ul>                                                                                                                                       | <ul style="list-style-type: none"> <li>• No se recomienda TS de rutina (III, B)</li> <li>• Reperfusión con TS si hay deterioro hemodinámico (I, B)</li> <li>• EQ o IDC como alternativa a TS si hay deterioro hemodinámico (IIa, C)</li> </ul>                                                              |
| <b>Declaración científica de AHA sobre CDI (2019)<sup>6</sup></b>                   | <ul style="list-style-type: none"> <li>• La TS, la EQ, el IDC, y la asistencia circulatoria mecánica deben tenerse en cuenta en los pacientes con EP e inestabilidad hemodinámica.</li> </ul>                                                                                                                                                    | <ul style="list-style-type: none"> <li>• Tras cuidadosa evaluación de criterios que predicen descompensación, puede considerarse la TS o TL en pacientes con riesgo de hemorragia no prohibitivo, La TM representa una opción para los pacientes de esta cohorte con riesgo hemorrágico elevado,</li> </ul> |
| <b>Consenso de grupo de trabajo ESC y EAPCI (2022)<sup>7</sup></b>                  | <ul style="list-style-type: none"> <li>• IDC como primera opción en contraindicaciones de TS</li> <li>• IDC si hay falta de mejoría 2-4 horas tras finalizar TS</li> </ul>                                                                                                                                                                       | <ul style="list-style-type: none"> <li>• IDC como primera opción en contraindicaciones de TS</li> <li>• IDC si hay falta de mejoría tras 24-48 horas en anticoagulación</li> </ul>                                                                                                                          |
| <b>Segunda actualización de las guías CHEST (2022)<sup>8</sup></b>                  | <ul style="list-style-type: none"> <li>• Reperfusión con TS</li> <li>• En indicación de TS, la TS por vena periférica es preferible a la TL</li> <li>• TM en centros con experiencia si hay (i) un alto riesgo de hemorragia, (ii) TS fallida, o (iii) shock que probablemente cause la muerte antes de que la TS pueda surtir efecto</li> </ul> | <ul style="list-style-type: none"> <li>• No se recomienda TS de rutina</li> <li>• Reperfusión con TS si hay deterioro hemodinámico y riesgo hemorrágico aceptable</li> </ul>                                                                                                                                |

EP, embolia pulmonar. AHA, Asociación Americana del Corazón. TS, trombólisis sistémica. IDC, intervencionismo dirigido por catéter. EQ, embolectomía quirúrgica. ESC, Sociedad Europea de Cardiología.

**Tabla 3 del material adicional**

Contraindicaciones de trombólisis sistémica

| Absolutas                                                                 | Relativas                                     |
|---------------------------------------------------------------------------|-----------------------------------------------|
| Antecedentes de ictus hemorrágico o de origen desconocido.                | Hipertensión grave refractaria (PAS>180 mmHg) |
| Ictus isquémico en los 6 meses previos                                    | AIT en los 6 meses previos                    |
| Neoplasia del sistema nervioso central                                    | Endocarditis infecciosa                       |
| Traumatismo mayor, cirugía o traumatismo craneal en las 3 semanas previas | RCP traumática                                |
| Sangrado activo                                                           | ACO                                           |
| Diátesis hemorrágica                                                      | Punción en localización no compresible        |
|                                                                           | Embarazo o primera semana postparto           |
|                                                                           | ECMO                                          |
|                                                                           | Enfermedad hepática avanzada                  |
|                                                                           | Úlcera péptica activa                         |

PAS, presión arterial sistólica. AIT: accidente isquémico transitorio. RCP, reanimación cardiopulmonar. ACO, anticoagulación oral. ECMO, oxigenador con membrana extracorpórea. Modificada de Pruszczyk et al<sup>7</sup>.

**Tabla 4 del material adicional**

Otras opciones de trombectomía mecánica

|                                                                             |           |                                                                                                                                                                                                                                                                                                                                                                                                                                                                                                                                                                                                                                                                                                                                                                                                                                                                                                                                                                                                                                                                              |
|-----------------------------------------------------------------------------|-----------|------------------------------------------------------------------------------------------------------------------------------------------------------------------------------------------------------------------------------------------------------------------------------------------------------------------------------------------------------------------------------------------------------------------------------------------------------------------------------------------------------------------------------------------------------------------------------------------------------------------------------------------------------------------------------------------------------------------------------------------------------------------------------------------------------------------------------------------------------------------------------------------------------------------------------------------------------------------------------------------------------------------------------------------------------------------------------|
| <b>Dispositivos dedicados</b>                                               | <b>no</b> | <ul style="list-style-type: none"> <li>• Históricamente se han usado catéteres guía de coronarias, JR4 y multipropósito 8-10 F, para aspirar el trombo.</li> <li>• La fragmentación del trombo, girando un catéter <i>pigtail</i> de 6 u 8 F sobre una guía 0,035" ubicada en las arterias pulmonares, es una técnica simple y atraumática, ampliamente utilizada por su disponibilidad y bajo coste. En ocasiones se puede combinar con angioplastia con balones periféricos de tamaño adecuado o con trombólisis local (TL) (terapia farmacomecánica)<sup>9,10</sup>.</li> <li>• Estas técnicas pueden resultar útiles en pacientes con EP-AR, ya que la recanalización de la oclusión central puede mejorar el <i>shock</i> obstructivo, pero existe el riesgo de embolizar material facilitando infarto pulmonar, o empeorar el <i>shock</i> por la embolización distal, además del riesgo de complicaciones mecánicas<sup>11</sup>.</li> <li>• El uso de dispositivos no dedicados se ha ido reduciendo progresivamente y no se recomienda en la actualidad.</li> </ul> |
| <b>Otros sistemas de trombectomía periférica usados en embolia pulmonar</b> |           | <ul style="list-style-type: none"> <li>• Su evidencia es escasa y en el caso de Angiojet se han detectado reacciones adversas hipotensivas<sup>12</sup>: <ul style="list-style-type: none"> <li>○ Trombectomía rotacional que combinan la fragmentación mecánica motorizada (Aspirex, Becton Dickinson).</li> <li>○ Trombectomía reolítica (Angiojet, Boston Scientific).</li> <li>○ Aspiración de gran calibre asociada a bypass veno-venoso para evitar pérdida de sangre (AngioVac, AngioDynamics).</li> </ul> </li> </ul>                                                                                                                                                                                                                                                                                                                                                                                                                                                                                                                                                |

Salinas P, et al. *Intervencionismo dirigido por catéter en la embolia aguda de pulmón. Posicionamiento SEC-Asociación de Cardiología Intervencionista/ SEC-Asociación de Cardiopatía Isquémica y Cuidados Agudos Cardiovasculares/SEC-GT Hipertensión Pulmonar. Rev Esp Cardiol. 2024*

F, French (3 mm); EP-AR, embolia pulmonar de alto riesgo.

**Figura 1 del material adicional.**

Casos de trombo en cavidades derechas (trombo en tránsito). A: trombo en cavidades derechas. B: material extraído con Flowtriever 24 F. C,D: trombo (\*) en canal de foramen oval. AD, aurícula derecha; AI, aurícula izquierda; VI, ventrículo izquierdo.

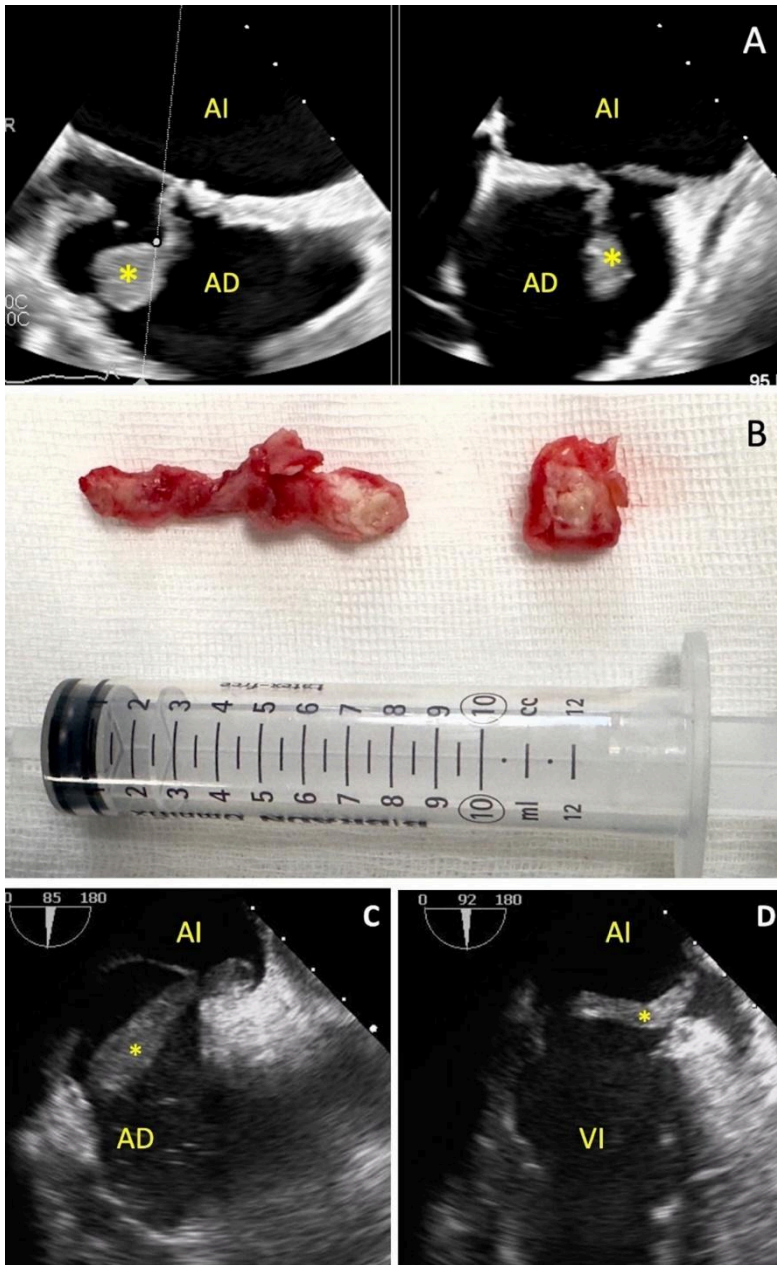

**Tabla 5 del material adicional**

Soporte farmacológico y circulatorio para el manejo de la embolia pulmonar de alto riesgo con inestabilidad hemodinámica.

| Vasopresores inotrópicos                  | Propiedades y uso                                                                                                                                                   | Efectos deletéreos                                                                                                                                                                                                                                                                             |
|-------------------------------------------|---------------------------------------------------------------------------------------------------------------------------------------------------------------------|------------------------------------------------------------------------------------------------------------------------------------------------------------------------------------------------------------------------------------------------------------------------------------------------|
| <b>Noradrenalina</b><br>0.2-1.0 µg/kg/min | ↑ Inotropismo VD<br>↑ Resistencias vasculares sistémicas<br>• Vasopresor más frecuente                                                                              | <ul style="list-style-type: none"> <li>• La vasoconstricción excesiva empeora la perfusión tisular</li> </ul>                                                                                                                                                                                  |
| <b>Vasopresina</b><br>0.02-0.04 U/min     | ↑ Resistencias vasculares sistémicas<br>= Resistencias vasculares pulmonares                                                                                        | <ul style="list-style-type: none"> <li>• Menos evidencia en este escenario, emplear si fallo de noradrenalina.</li> </ul>                                                                                                                                                                      |
| <b>Dobutamina</b> 2-5 µg/kg/min           | ↑ Inotropismo VD<br>↓ Presiones de llenado<br>↓ Resistencias vasculares pulmonares<br>• Inotrópico de elección                                                      | <ul style="list-style-type: none"> <li>• Puede empeorar la hipotensión cuando se usa sin vasopresor especialmente si además hay disfunción VI</li> <li>• Puede aumentar el desequilibrio ventilación/perfusión</li> <li>• Puede producir arritmias tanto supra como ventriculares</li> </ul>   |
| <b>Levosimendán</b><br>0.05-0.2 µg/kg/min | ↑ Inotropismo VD<br>↓ Resistencias vasculares pulmonares<br>• Favorece el acoplamiento del VD-arteria pulmonar                                                      | <ul style="list-style-type: none"> <li>• Puede empeorar la hipotensión</li> <li>• Puede producir arritmias tanto supra como ventriculares</li> <li>• Escasa evidencia, puede tener un papel en destete de soporte ventricular</li> </ul>                                                       |
| <b>ECMO VA</b>                            | ↓ PAD<br>= PSAP<br>= Volumen latido VD<br>↑ Poscarga VI<br>↓ Volumen latido VI<br>• Precio accesible<br>• Rápida inserción percutánea<br>• Capacidad de oxigenación | <ul style="list-style-type: none"> <li>• Riesgo aumentado de sangrado del acceso vascular especialmente si TS</li> <li>• Riesgo de infección local y trombosis</li> <li>• Duración limitada 5-10 días (recomendado)</li> <li>• Curva de aprendizaje y resultados centro-dependiente</li> </ul> |

VD ventrículo derecho, VI ventrículo izquierdo, PAD presión aurícula derecha, PSAP presión sistólica de arteria pulmonar, ECMO VA membrana extracorpórea de oxigenación venoarterial.

**Tabla 6 del material adicional**

Situaciones especiales relacionadas con la embolia pulmonar

|                                                  |                                                                                                                                                                                                                                                                                                                                                                                                                                                                                                                                                                                                                                                                                                                                                                                                                                                                                                                                                                                                                                                                                                                                  |
|--------------------------------------------------|----------------------------------------------------------------------------------------------------------------------------------------------------------------------------------------------------------------------------------------------------------------------------------------------------------------------------------------------------------------------------------------------------------------------------------------------------------------------------------------------------------------------------------------------------------------------------------------------------------------------------------------------------------------------------------------------------------------------------------------------------------------------------------------------------------------------------------------------------------------------------------------------------------------------------------------------------------------------------------------------------------------------------------------------------------------------------------------------------------------------------------|
| <b>EP y embarazo</b>                             | <ul style="list-style-type: none"> <li>• La EP es una causa frecuente de morbimortalidad en el embarazo. Ante la sospecha, debe iniciarse anticoagulación (HNF o HBPM) y confirmar diagnóstico mediante técnica de imagen, inicialmente ecocardiograma y si es imprescindible un TC de baja dosis que ha demostrado tener un balance riesgo/beneficio favorable en este contexto tanto para la madre como para el feto<sup>13</sup>.</li> <li>• Con respecto al tratamiento de la EP grave en el embarazo, clásicamente se ha recomendado la TS. Sin embargo tanto el embarazo como el puerperio son una contraindicación relativa, por lo que este panel de expertos sugiere TM como primera opción por ser una técnica más segura desde el punto de vista del riesgo hemorrágico<sup>14</sup>.</li> <li>• En aquellos casos de gravedad extrema, la ECMO se puede considerar como terapia puente, si bien no exenta de riesgos para madre y feto, por lo que recomendamos una valoración minuciosa por parte de un equipo multidisciplinar que debe incluir necesariamente a obstetras y neonatólogos<sup>15</sup>.</li> </ul> |
| <b>ECMO en parada cardíaca causada por la EP</b> | <ul style="list-style-type: none"> <li>• La reanimación cardiopulmonar asistida por ECMO es un recurso que en determinadas circunstancias permite mejorar los resultados de la atención a la parada cardíaca con respecto a la reanimación convencional.</li> <li>• Aunque puede ser un recurso en determinados pacientes cuya causa de parada es la EP, como puente a una terapia o a recuperación, no existe evidencia sobre su eficacia en este contexto.</li> <li>• La ECMO-reanimación no mejoró los resultados en la parada extrahospitalaria por EP con respecto a la reanimación convencional en un subanálisis del ensayo aleatorizado Prague OHCA<sup>16</sup>, por lo que debería usarse sólo en casos seleccionados.</li> <li>• La ECMO es compatible con un procedimiento de TM</li> </ul>                                                                                                                                                                                                                                                                                                                          |
| <b>EP en postquirúrgico inmediato</b>            | <ul style="list-style-type: none"> <li>• La EP es una complicación relativamente frecuente en pacientes que han sido sometidos a cirugía reciente.</li> <li>• En este escenario, el IDC ofrece evidentes ventajas con respecto a la TS, que en muchos casos estará absolutamente contraindicada y en otros tendrá un riesgo hemorrágico superior.</li> </ul>                                                                                                                                                                                                                                                                                                                                                                                                                                                                                                                                                                                                                                                                                                                                                                     |
| <b>EP en paciente oncológico</b>                 | <ul style="list-style-type: none"> <li>• Aunque en general las recomendaciones de tratamiento de la EP en pacientes con cáncer no difieren de las del resto de población y el cáncer per se no es una contraindicación absoluta de fibrinólisis (excepto casos concretos como tumores intracraneales), los pacientes oncológicos están escasamente representados en los ensayos y son un factor predictor de hemorragia con TS<sup>17,18</sup>.</li> <li>• En opinión de este grupo, en este contexto debería priorizarse el uso del IDC para minimizar el riesgo hemorrágico en caso de EP que precise de terapia de reperfusión.</li> </ul>                                                                                                                                                                                                                                                                                                                                                                                                                                                                                    |
| <b>EP con trombo en cavidades derechas</b>       | <ul style="list-style-type: none"> <li>• Al menos un 5 de los pacientes con EP tienen trombo en cavidades derechas (también llamado trombo en tránsito) visible en ecocardiograma.</li> <li>• Se trata de un factor de mal pronóstico y su tratamiento correcto es incierto con alta mortalidad de TS y EQ<sup>19,20</sup>, y es clave la permeabilidad y participación o no del foramen oval.</li> <li>• Si hay trombo a través del foramen oval permeable es una situación de alto riesgo de embolia sistémica e ictus y, aunque hay casos descritos de aspiración exitosa con o sin protección embólica cerebral, este panel de expertos no recomienda la TM en este contexto por el riesgo de seccionar el trombo al aspirar desde aurícula derecha (Figura suplementaria 2).</li> <li>• En caso de trombo intracardiaco sin participación de foramen oval la TM ha demostrado ser eficaz en casos seleccionados (figura 1 del material adicional)<sup>21</sup>.</li> </ul>                                                                                                                                                  |

EP, embolia pulmonar. HBPM, heparina de bajo peso molecular. HNF, heparina no fraccionada. TC, tomografía computerizada. TS, trombólisis sistémica. TM, trombectomía mecánica. ECMO, oxigenador de membrana extracorpórea. EQ, embolectomía quirúrgica.

**Tabla 7 del material adicional**

Factores de riesgo protrombóticos. Modificada de guías clínicas 2019<sup>4,\*</sup>

| Factor de riesgo | Transitorio                                                                                                                                                                                                                                                                                                                                                                                                     | Permanente                                                                                                                                                                     |
|------------------|-----------------------------------------------------------------------------------------------------------------------------------------------------------------------------------------------------------------------------------------------------------------------------------------------------------------------------------------------------------------------------------------------------------------|--------------------------------------------------------------------------------------------------------------------------------------------------------------------------------|
| Mayor            | <ul style="list-style-type: none"><li>● Cirugía mayor (anestesia general &gt; 30 min)</li><li>● Encamamiento hospitalario &gt; 3 días</li><li>● Traumatismo con fracturas</li><li>● Cesárea</li></ul>                                                                                                                                                                                                           | <ul style="list-style-type: none"><li>● Cáncer activo</li><li>● Síndrome antifosfolípido</li><li>● Historia de <math>\geq 2</math> episodios trombóticos idiopáticos</li></ul> |
| Menor            | <ul style="list-style-type: none"><li>● Cirugía menor (anestesia general &lt; 30 min)</li><li>● Encamamiento domiciliario <math>\geq 3</math> días</li><li>● Encamamiento hospitalario &lt; 3 días</li><li>● Uso de estrógenos/anticoncepción</li><li>● Embarazo y/o puerperio</li><li>● Viajes prolongados</li><li>● Lesión en pierna, sin fractura, con movilidad reducida <math>\geq 3</math> días</li></ul> | <ul style="list-style-type: none"><li>● Enfermedad inflamatoria intestinal</li><li>● Enfermedad autoinmune activa</li></ul>                                                    |

\* Las comorbilidades permanentes pueden fluctuar a lo largo del tiempo, lo que modifica el riesgo de recurrencia.



**Tabla 8 del material adicional**

Datos clínicos y analíticos que soportan ACO indefinida tras EP. Modificada de Lobo et al<sup>22</sup>.

| Factor                              | Comentarios                                                           |
|-------------------------------------|-----------------------------------------------------------------------|
| Dímero D (1 mes tras suspender ACO) | Dímero D elevado favorece ACO indefinida                              |
| EP riesgo alto o intermedio-alto    | La gravedad de la presentación favorece mantener ACO                  |
| HPTEC                               | Obliga a ACO de por vida                                              |
| ETEC                                | Riesgo de recurrencia al suspender ACO. Se recomienda ACO indefinida. |
| Estudios de trombofilia             | No están indicados sistemáticamente                                   |

EP, Embolia pulmonar. ACO, anticoagulación oral. ETEC, enfermedad tromboembólica crónica pulmonar. HPTEC, hipertensión pulmonar

#### **BIBLIOGRAFÍA DEL MATERIAL ADICIONAL**

1. Mismetti P, Laporte S, Pellerin O, et al. Effect of a retrievable inferior vena cava filter plus anticoagulation vs anticoagulation alone on risk of recurrent pulmonary embolism: a randomized clinical trial. *JAMA*. 2015;313(16):1627-1635. doi:10.1001/jama.2015.3780
2. Bikdeli B, Chatterjee S, Desai NR, et al. Inferior Vena Cava Filters to Prevent Pulmonary Embolism: Systematic Review and Meta-Analysis. *J Am Coll Cardiol*. 2017;70(13):1587-1597. doi:10.1016/j.jacc.2017.07.775
3. Young T, Sriram KB. Vena caval filters for the prevention of pulmonary embolism. *Cochrane Database Syst Rev*. 2020;10(10):CD006212. doi:10.1002/14651858.CD006212.pub5
4. Konstantinides SV, Meyer G, Becattini C, et al. 2019 ESC Guidelines for the diagnosis and management of acute pulmonary embolism developed in collaboration with the European Respiratory Society (ERS): The Task Force for the diagnosis and management of acute pulmonary embolism of the European Society of Cardiology (ESC). *European Heart Journal*. 2020;41(4):543-603. doi:10.1093/eurheartj/ehz405
5. Jaff MR, McMurtry MS, Archer SL, et al. Management of massive and submassive pulmonary embolism, iliofemoral deep vein thrombosis, and chronic thromboembolic pulmonary hypertension: a scientific statement from the American Heart Association. *Circulation*. 2011;123(16):1788-1830. doi:10.1161/CIR.0b013e318214914f
6. Giri J, Sista AK, Weinberg I, et al. Interventional Therapies for Acute Pulmonary Embolism: Current Status and Principles for the Development of Novel Evidence: A Scientific Statement From the American Heart Association. *Circulation*. 2019;140(20):e774-e801. doi:10.1161/CIR.0000000000000707
7. Pruszczyk P, Klok FA, Kucher N, et al. Percutaneous treatment options for acute pulmonary embolism: a clinical consensus statement by the ESC Working Group on Pulmonary Circulation and Right Ventricular Function and the European Association of Percutaneous Cardiovascular Interventions. *EuroIntervention*. 2022;18(8):e623-e638. doi:10.4244/EIJ-D-22-00246
8. Stevens SM, Woller SC, Kreuziger LB, et al. Antithrombotic Therapy for VTE Disease: Second Update of the CHEST Guideline and Expert Panel Report. *CHEST*. 2021;160(6):e545-e608. doi:10.1016/j.chest.2021.07.055

9. Salinas P, Vázquez-Álvarez ME, Salvatella N, et al. Catheter-directed therapy for acute pulmonary embolism: results of a multicenter national registry. *Revista Española de Cardiología (English Edition)*. 2024;77(2):138-147. doi:10.1016/j.rec.2023.06.005
10. Kuo WT, Gould MK, Louie JD, Rosenberg JK, Sze DY, Hofmann LV. Catheter-directed therapy for the treatment of massive pulmonary embolism: systematic review and meta-analysis of modern techniques. *J Vasc Interv Radiol*. 2009;20(11):1431-1440. doi:10.1016/j.jvir.2009.08.002
11. Jermakow MT, Obradovic S, Salinas P, et al. Initial results of investigator initiated international database on catheter directed therapy of acute pulmonary embolism. *Cardiol J*. Published online September 29, 2023. doi:10.5603/cj.95949
12. Götzinger F, Lauder L, Sharp ASP, et al. Interventional therapies for pulmonary embolism. *Nat Rev Cardiol*. 2023;20(10):670-684. doi:10.1038/s41569-023-00876-0
13. Gillespie CD, Yates A, Hughes M, et al. Validating the safety of low-dose CTPA in pregnancy: results from the OPTICA (Optimised CT Pulmonary Angiography in Pregnancy) Study. *Eur Radiol*. Published online January 31, 2024. doi:10.1007/s00330-024-10593-y
14. La Rosa M, Emezienna N, Olson G. Pulmonary Embolism in Pregnancy. *Clin Obstet Gynecol*. 2023;66(1):231-236. doi:10.1097/GRF.0000000000000738
15. Dutta S, Hirani S, Heda A, et al. Extracorporeal Membrane Oxygenation (ECMO): A Lifeline for Pregnant and Postpartum Women. *Cureus*. 2023;15(8):e43586. doi:10.7759/cureus.43586
16. Pudil J, Rob D, Smalcova J, et al. Pulmonary embolism-related refractory out-of-hospital cardiac arrest and extracorporeal cardiopulmonary resuscitation: Prague OHCA study post hoc analysis. *Eur Heart J Acute Cardiovasc Care*. 2023;12(8):507-512. doi:10.1093/ehjacc/zuad052
17. Jara-Palomares L, Jiménez D, Bikdeli B, et al. Derivation and validation of a clinical prediction rule for thrombolysis-associated major bleeding in patients with acute pulmonary embolism: the BACS score. *Eur Respir J*. Published online July 23, 2020:2002336. doi:10.1183/13993003.02336-2020
18. Tirandi A, Preda A, Carbone F, Montecuccio F, Liberale L. Pulmonary embolism in patients with cancer: An updated and operative guide for diagnosis and management. *Int J Cardiol*. 2022;358:95-102. doi:10.1016/j.ijcard.2022.04.068

19. Athappan G, Sengodan P, Chacko P, Gandhi S. Comparative efficacy of different modalities for treatment of right heart thrombi in transit: a pooled analysis. *Vasc Med.* 2015;20(2):131-138. doi:10.1177/1358863X15569009
20. Torbicki A, Galié N, Covezzoli A, et al. Right heart thrombi in pulmonary embolism: results from the International Cooperative Pulmonary Embolism Registry. *J Am Coll Cardiol.* 2003;41(12):2245-2251. doi:10.1016/s0735-1097(03)00479-0
21. Khosla A, Mojibian H, Assi R, Tantawy H, Singh I, Pollak J. Right heart thrombi (RHT) and clot in transit with concomitant PE management: Approach and considerations. *Pulm Circ.* 2022;12(2):e12080. doi:10.1002/pul2.12080
22. Lobo JL, Alonso S, Arenas J, et al. Consenso multidisciplinar para el manejo de la tromboembolia de pulmón. *Arch Bronconeumol.* 2022;58(3):246-254. doi:10.1016/j.arbres.2021.01.031
